# Supplementary material
Source: PubMed Central journal article supplement (PMC3064745)

## Supplementary information

## Supplementary experimental procedures

## Glycolipid synthesis

4'-Deoxy- $\alpha$ -GalCer **d** was prepared by the coupling of known armed sugar donor<sup>1</sup> **a** and disarmed acceptor<sup>2</sup> **b**, followed by a two stage deprotection of glycosylceramide **c**.

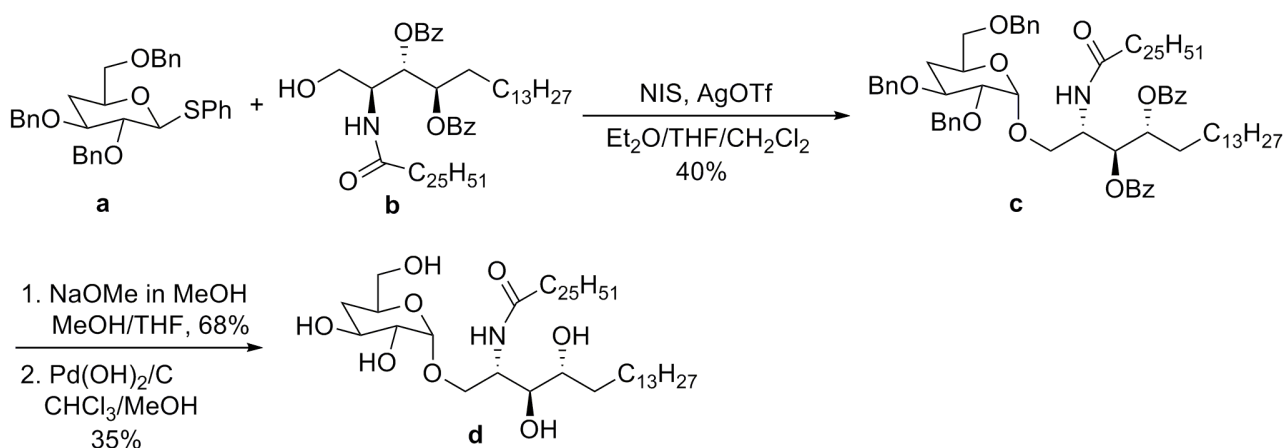

1. "Synthesis and Evaluation of 3"- and 4"-Deoxy and -Fluoro Analogs of the Immunostimulatory Glycolipid, KRN7000," Raju, R.; Castillo, B. F.; Richardson, S. K.; Thakur, M.; Severins, R.; Kronenberg, M.; Howell, A. R. *Bioorg. Med. Chem. Lett.* **2009**, *19*, 4122-4125.
2. "Synthesis and Biological Evaluation of  $\alpha$ -Galactosylceramide (KRN7000) and Isoglobotrihexosylceramide (iGb3)," Xia, C.; Yao, Q.; Schumann, J.; Rossy, E.; Chen, W.; Zhu, L.; Zhang, W.; Libero, G. D.; Wang, P. G. *Bioorg. Med. Chem. Lett.* **2006**, *16*, 2195-2199.

## Supplementary information – crystallography

Data were processed with programs from the CCP4 suite (CCP4, 1994). Crystals of the different ternary complexes diffracted to a range of 2.7 Å - 3.0 Å, and belong to the space group  $P2_12_12_1$ . Crystal structures of the different NKT TCR-CD1d-Ag complexes were solved using Phaser using the V $\beta$ 8.2 NKT TCR-CD1d- $\alpha$ -GalCer complex (Protein Data Bank ID code 3HE6) minus  $\alpha$ -GalCer as the search model, and subsequently refined using Refmac. To prevent model bias, FreeR of the NKT TCR-CD1d- $\alpha$ -GalCer structure was used in the experimental intensities scaling process in Scala as well as the implementation of the simulated annealing protocol in Phenix (Zwart et al., 2008). Glycolipid libraries were generated via the program Sketcher, and the glycolipid models were subsequently built into the work models. Restrained refinement followed by the inclusion of translation libration screw parameters at the later stage interspersed with rounds of model building with Coot (Emsley and Cowtan, 2004) were used to improve the work model as monitored by the  $R_{\text{free}}$  values. Programs within the CCP4 suite were utilized to assess the quality of the structures. For data collection and refinement statistics, see Supplementary Table 2. All molecular graphics illustrations were generated using PyMol (DeLano, 2002). The residues that could not be modelled in the NKT TCR-CD1d-OCH were: CD1d: residues 1-5, and 91-92;  $\beta_2\text{m}$ : residue 1; TCR  $\alpha$ -chain: residues 185, and 208-210; and TCR  $\beta$ -chain: residues 1-2, and 97-102 (CDR3 $\beta$ ). The residues that could not be modelled in the NKT TCR-CD1d-C20:2 complex were: CD1d: residues 1-6, 108, and 301-302; TCR  $\alpha$  chain: residues 185 and 208-210; and TCR  $\beta$  chain: residues 1-3 and 97-102 (CDR3 $\beta$ ); C20:2: sphingosine chain: C18; and acyl chain: C7-C18. The residues that could not be modelled in the NKT TCR-CD1d- $\alpha$ -GlcCer complex were: CD1d: residues 1-6, 89, 108-109, 241 and 301-302;  $\beta_2\text{m}$ : residue 1; TCR  $\alpha$ -chain: residues 99 (CDR3 $\alpha$ ), 185, and 208-210; and TCR  $\beta$  chain: residues 1-2, 97-101 (CDR3 $\beta$ ) and 247; - $\alpha$ -GlcCer: sphingosine chain: C9-C18; and acyl chain: C4-C20. The residues that could not be modelled in the NKT TCR-CD1d-3',4''-deoxy- $\alpha$ -GalCer were: CD1d: residues 1-5, 108 and 301-302; TCR  $\alpha$  chain: residues 185-186, and 208-210; and TCR  $\beta$  chain: residues 1-2, and 97-100 (CDR3 $\beta$ ); 3',4''-deoxy- $\alpha$ -GalCer: sphingosine chain: C12-18. The residues that could not be modelled in the NKT TCR-CD1d-4',4''deoxy- $\alpha$ -GalCer were: CD1d: residues 1-6, 90, 108, and 301-302; TCR  $\alpha$  chain: 185, and 208-210; and TCR  $\beta$  chain: 1-2, and 98-101 (CDR3 $\beta$ ); 4',4''-deoxy- $\alpha$ -GalCer: acyl chain: C4-5.

## **Supplementary Figure Legends**

**Supplementary Fig. 1** Serum cytokine analysis. Male C57BL/6 mice (n=3) were injected i.p. with 1µg of glycolipid or the equivalent volume of vehicle buffer in 100µl PBS and bleed at 2hr and 20hr time-points. Serum was isolated via centrifugation and IFN-γ and IL-4 levels were quantified by Cytometric Bead Array (BD Biosciences). Error bars represent SEM.

**Supplementary Fig. 2.** Electron density for the AGL ligands, as omit maps and final 2Fo-Fc maps that highlights that the positioning of the various head groups are unambiguous

**Supplementary Table 1. Surface Plasmon Resonance measurement of the mouse NKT TCR to CD1d- $\alpha$ -GalCer and analogues**

| CD1d-glycolipids               | Mouse NKT TCR V $\beta$ 8.2 |                                             |                    |                 |                 |          |
|--------------------------------|-----------------------------|---------------------------------------------|--------------------|-----------------|-----------------|----------|
|                                | $K_{Deq}$ (nM)              | $k_a$ ( $\times 10^5$ M $^{-1}$ s $^{-1}$ ) | $k_d$ (s $^{-1}$ ) | $t_{1/2}$ (sec) | $K_D$ calc (nM) | Chi $^2$ |
| $\alpha$ GalCer                | 59.6                        | 5.84                                        | 0.03               | 19.69           | 54.7            | 3.72     |
| OCH                            | 287                         | 1.87                                        | 0.04               | 14.35           | 234             | 3.31     |
| $\alpha$ -GalCer (C20:2)       | 68.4                        | 6.31                                        | 0.04               | 15.48           | 64.4            | 4.07     |
| $\alpha$ -GlcCer (C20:2)       | 684                         | 4.69                                        | 0.30               | 2.08            | 645             | 2.22     |
| 3',4''-deoxy- $\alpha$ -GalCer | 174                         | 5.99                                        | 0.11               | 6.00            | 175             | 2.67     |
| 4',4''-deoxy- $\alpha$ -GalCer | 423                         | 3.88                                        | 0.24               | 2.62            | 617             | 6.37     |
| 4'-deoxy- $\alpha$ -GalCer     | 525                         | 4.01                                        | 0.22               | 2.83            | 556             | 9.31     |
| $\alpha$ -GalCer (C24)         | 49.3                        | 6.77                                        | 0.03               | 21.14           | 44.1            | 4.24     |
| $\alpha$ -GlcCer (C24)         | 554                         | 2.40                                        | 0.20               | 3.47            | 814             | 6.44     |

$K_{Deq}$  derived by equilibrium fit option

$K_D$  calc derived by kinetic fit

$t_{1/2} = 0.693/k_d$

**Supplementary Table 2 Data collection and refinement statistics**

|                                      | NKT TCR-mCD1d-C20:2                                                | NKT TCR-mCD1d- $\alpha$ -GlcCer                                    | NKT TCR-mCD1d-3',4''-deoxy- $\alpha$ -GalCer                       | NKT TCR-mCD1d-4',4''-deoxy- $\alpha$ -GalCer                       | NKT TCR-mCD1d-OCH                                                  |
|--------------------------------------|--------------------------------------------------------------------|--------------------------------------------------------------------|--------------------------------------------------------------------|--------------------------------------------------------------------|--------------------------------------------------------------------|
| <b>Data Collection</b>               |                                                                    |                                                                    |                                                                    |                                                                    |                                                                    |
| Resolution limits (Å)                | 50-2.9 (3.06-2.90)                                                 | 50-3.0 (3.16-3.00)                                                 | 50-3.0 (3.16-3.00)                                                 | 50-2.8 (2.95-2.80)                                                 | 50-2.7 (2.85-2.70)                                                 |
| Space Group                          | P2 <sub>1</sub> 2 <sub>1</sub> 2 <sub>1</sub>                      |
| Cell dimensions                      | $a=58.95, b=87.05, c=234.86;$<br>$\alpha=\beta=\gamma=90.00^\circ$ | $a=59.17, b=85.77, c=237.81;$<br>$\alpha=\beta=\gamma=90.00^\circ$ | $a=58.99, b=86.73, c=235.20;$<br>$\alpha=\beta=\gamma=90.00^\circ$ | $a=58.58, b=86.26, c=236.10;$<br>$\alpha=\beta=\gamma=90.00^\circ$ | $a=59.04, b=87.31, c=235.65;$<br>$\alpha=\beta=\gamma=90.00^\circ$ |
| Total N <sup>o</sup> observations    | 425891                                                             | 245371                                                             | 234455                                                             | 200512                                                             | 118283                                                             |
| N <sup>o</sup> unique observations   | 27541                                                              | 23592                                                              | 24812                                                              | 28434                                                              | 32741                                                              |
| Multiplicity                         | 15.5 (15.8)                                                        | 10.4 (10.5)                                                        | 9.4 (9.5)                                                          | 7.1 (6.9)                                                          | 3.6 (3.6)                                                          |
| Data Completeness                    | 100 (100)                                                          | 94.5 (95.9)                                                        | 100 (100)                                                          | 93.3 (91.0)                                                        | 95.9 (97.4)                                                        |
| I/ $\sigma$                          | 9.7 (2.5)                                                          | 9.4 (2.0)                                                          | 9.3 (2.0)                                                          | 9.7 (2.0)                                                          | 9.3 (2.1)                                                          |
| <sup>1</sup> R <sub>p.i.m</sub> (%)  | 9.6 (40.1)                                                         | 6.9 (34.0)                                                         | 6.8 (36.6)                                                         | 7.4 (34.3)                                                         | 5.2 (33.1)                                                         |
| Mosaicity                            | 0.87                                                               | 0.49                                                               | 0.53                                                               | 0.68                                                               | 0.45                                                               |
| <b>Refinement statistics</b>         |                                                                    |                                                                    |                                                                    |                                                                    |                                                                    |
| <sup>2</sup> R <sub>factor</sub> (%) | 22.5                                                               | 23.2                                                               | 21.3                                                               | 22.0                                                               | 21.4                                                               |
| <sup>3</sup> R <sub>free</sub> (%)   | 27.7                                                               | 30.0                                                               | 27.7                                                               | 27.9                                                               | 25.7                                                               |
| <b>Non hydrogen atoms</b>            |                                                                    |                                                                    |                                                                    |                                                                    |                                                                    |
| - protein                            | 6337                                                               | 6038                                                               | 6318                                                               | 6434                                                               | 6475                                                               |
| - lipid(s)                           | 54                                                                 | 54                                                                 | 58                                                                 | 58                                                                 | 61                                                                 |
| - water                              | 35                                                                 | 22                                                                 | 18                                                                 | 55                                                                 | 68                                                                 |
| - other                              | 75                                                                 | 63                                                                 | 72                                                                 | 70                                                                 | 102                                                                |
| <b>Ramachandran plot</b>             |                                                                    |                                                                    |                                                                    |                                                                    |                                                                    |
| - Most favoured (%)                  | 90.4                                                               | 89.0                                                               | 90.4                                                               | 90.1                                                               | 91.6                                                               |
| - Allowed region (%)                 | 9.6                                                                | 11.0                                                               | 9.6                                                                | 9.9                                                                | 8.4                                                                |
| <b>B-factors (Å<sup>2</sup>)</b>     |                                                                    |                                                                    |                                                                    |                                                                    |                                                                    |
| - Average main chain                 | 58.2                                                               | 73.6                                                               | 73.6                                                               | 56.4                                                               | 57.2                                                               |
| - Average side chain                 | 58.2                                                               | 72.6                                                               | 73.7                                                               | 56.5                                                               | 57.5                                                               |
| - lipid(s)                           | 49.9                                                               | 75.7                                                               | 61.3                                                               | 59.3                                                               | 50.4                                                               |
| - water                              | 51.4                                                               | 63.1                                                               | 64.5                                                               | 41.0                                                               | 50.8                                                               |
| rmsd bonds (Å)                       | 0.006                                                              | 0.006                                                              | 0.006                                                              | 0.006                                                              | 0.006                                                              |
| rmsd angles (°)                      | 0.941                                                              | 0.992                                                              | 0.920                                                              | 0.897                                                              | 0.943                                                              |

$${}^1R_{p.i.m} = \frac{\sum_{hkl} [1/(N-1)]^{1/2} \sum_i |I_{hkl, i} - \langle I_{hkl} \rangle|}{\sum_{hkl} \langle I_{hkl} \rangle}$$

$${}^2R_{factor} = \frac{\sum_{hkl} ||F_o| - |F_c||}{\sum_{hkl} |F_o|} \text{ for all data except } \approx 5\% \text{ which were used for } {}^3R_{free} \text{ calculation}$$

Values in parentheses refer to the highest resolution bin

**Supplementary Table 3. Contacts Table between NKT TCR and CD1d-analogue complexes**

| CDR                                              | NKT V $\beta$ 8.2                                                                                         | NKT TCR-CD1d- $\alpha$ -GalCer                                                                        |                                                                                                           | NKT TCR-CD1d-C20:2                                                                                    | NKT TCR-CD1d- $\alpha$ -GlcCer                                         | NKT TCR-CD1d-3',4''-deoxy- $\alpha$ -GalCer | NKT TCR-CD1d-4',4''-deoxy- $\alpha$ -GalCer                     | NKT TCR-CD1d-OCH          |
|--------------------------------------------------|-----------------------------------------------------------------------------------------------------------|-------------------------------------------------------------------------------------------------------|-----------------------------------------------------------------------------------------------------------|-------------------------------------------------------------------------------------------------------|------------------------------------------------------------------------|---------------------------------------------|-----------------------------------------------------------------|---------------------------|
|                                                  |                                                                                                           | CD1d                                                                                                  | Bond                                                                                                      | CD1d                                                                                                  | CD1d                                                                   | CD1d                                        | CD1d                                                            | CD1d                      |
| CDR1 $\alpha$                                    | Thr27                                                                                                     |                                                                                                       |                                                                                                           |                                                                                                       |                                                                        | <i>Val72</i> (VDW)                          |                                                                 | <i>Val72</i> (VDW)        |
|                                                  | Pro28                                                                                                     |                                                                                                       |                                                                                                           | <i>Val72</i> (VDW)                                                                                    | <i>Ser76</i> (VDW)                                                     | Val72, <i>Ser76</i> (VDW)                   | Val72, <i>Ser76</i> (VDW)                                       | Val72, <i>Ser76</i> (VDW) |
| CDR3 $\alpha$                                    | Asp94 <sup>O<math>\delta</math><sub>1</sub></sup>                                                         | Arg79 <sup>N<math>\eta</math><sub>1</sub></sup> , Arg79 <sup>N<math>\eta</math><sub>2</sub></sup>     | Salt bridge                                                                                               | Arg79 <sup>N<math>\eta</math><sub>1</sub></sup> , Arg79 <sup>N<math>\eta</math><sub>2</sub></sup>     | Same as C20:2                                                          | Same as C20:2                               | Same as C20:2                                                   | Same as C20:2             |
|                                                  | Asp94 <sup>O<math>\delta</math><sub>2</sub></sup>                                                         | Arg79 <sup>N<math>\eta</math><sub>1</sub></sup> , Arg79 <sup>N<math>\eta</math><sub>2</sub></sup>     | Salt bridge                                                                                               | Arg79 <sup>N<math>\eta</math><sub>1</sub></sup> , Arg79 <sup>N<math>\eta</math><sub>2</sub></sup>     | Same as C20:2                                                          | Same as C20:2                               | Same as C20:2                                                   | Same as C20:2             |
|                                                  | Asp94                                                                                                     | Arg79                                                                                                 | VDW                                                                                                       | Arg79                                                                                                 | Same as C20:2                                                          | Same as C20:2                               | Same as C20:2                                                   | Same as C20:2             |
|                                                  | Arg95 <sup>N<math>\epsilon</math></sup>                                                                   | Asp80 <sup>O<math>\delta</math><sub>1</sub></sup> , Asp80 <sup>O<math>\delta</math><sub>2</sub></sup> | Salt bridge                                                                                               | Asp80 <sup>O<math>\delta</math><sub>1</sub></sup> , Asp80 <sup>O<math>\delta</math><sub>2</sub></sup> | Same as C20:2                                                          | *Not seen                                   | Same as C20:2                                                   | Same as C20:2             |
|                                                  | Arg95 <sup>N<math>\eta</math><sub>1</sub></sup>                                                           | Asp80 <sup>O<math>\delta</math><sub>1</sub></sup>                                                     | Salt bridge                                                                                               | Asp80 <sup>O<math>\delta</math><sub>1</sub></sup>                                                     | Same as C20:2                                                          | *Not seen                                   | Same as C20:2                                                   | Same as C20:2             |
|                                                  |                                                                                                           | <i>Ser76</i> <sup>O<math>\gamma</math></sup>                                                          | H bond                                                                                                    | <b>Arg79<sup>N<math>\epsilon</math></sup></b>                                                         | Same as C20:2                                                          | <i>Ser76</i> <sup>O</sup>                   | -                                                               | <i>Ser76</i> <sup>O</sup> |
|                                                  | Arg95 <sup>N<math>\eta</math><sub>2</sub></sup>                                                           | -                                                                                                     | -                                                                                                         | -                                                                                                     | <i>Asp80</i> <sup>O<math>\delta</math><sub>1</sub></sup> (Salt bridge) | -                                           | <i>Arg79</i> <sup>N<math>\eta</math><sub>2</sub></sup> (H bond) | -                         |
|                                                  | Arg95                                                                                                     | <i>Ser76</i> , Arg79, Asp80                                                                           | VDW                                                                                                       | <i>Ser76</i> , Arg79, Asp80                                                                           | Same as C20:2                                                          | <i>Ser76</i> , Arg79                        | Same as C20:2                                                   | Same as C20:2             |
|                                                  | Gly96 <sup>N</sup>                                                                                        | Asp153 <sup>O<math>\delta</math><sub>2</sub></sup>                                                    | H bond                                                                                                    | -                                                                                                     | -                                                                      | -                                           | -                                                               | -                         |
|                                                  | Gly96                                                                                                     | Ala152, Asp153                                                                                        | VDW                                                                                                       | Ala152, Asp153                                                                                        | Same as C20:2                                                          | Same as C20:2                               | Same as C20:2                                                   | Same as C20:2             |
| Ser97                                            | Val149                                                                                                    | VDW                                                                                                   | Val149                                                                                                    | Same as C20:2                                                                                         | Val149, <i>Asp153</i>                                                  | -                                           | Same as C20:2                                                   |                           |
| Leu99 <sup>O</sup>                               | Arg79 <sup>N<math>\eta</math><sub>2</sub></sup>                                                           | H bond                                                                                                | Arg79 <sup>N<math>\eta</math><sub>2</sub></sup>                                                           | *Not seen                                                                                             | Same as C20:2                                                          | -                                           | -                                                               |                           |
| Leu99                                            | Arg79, Val149                                                                                             | VDW                                                                                                   | Val149, <b>Asp80</b> , <b>Glu83</b> , <b>Leu84</b>                                                        | *Not seen                                                                                             | Val149, Glu83                                                          | <i>Arg79</i> , Val149, Asp80, Leu84         | <i>Arg79</i> , Val149, Asp80, Leu84                             |                           |
| Gly100                                           | Arg79                                                                                                     | VDW                                                                                                   | -                                                                                                         | Arg79                                                                                                 | Arg79                                                                  | -                                           | -                                                               |                           |
| Arg103 <sup>N<math>\eta</math><sub>1</sub></sup> | Glu83 <sup>O<math>\epsilon</math><sub>1</sub></sup> , Glu83 <sup>O<math>\epsilon</math><sub>2</sub></sup> | Salt bridge                                                                                           | Glu83 <sup>O<math>\epsilon</math><sub>1</sub></sup> , Glu83 <sup>O<math>\epsilon</math><sub>2</sub></sup> | *Not seen                                                                                             | Same as C20:2                                                          | Same as C20:2                               | Same as C20:2                                                   |                           |
| Arg103 <sup>N<math>\eta</math><sub>2</sub></sup> | -                                                                                                         | -                                                                                                     | <b>Glu83</b> <sup>O<math>\epsilon</math><sub>1</sub></sup> (Salt bridge)                                  | -                                                                                                     | -                                                                      | -                                           | -                                                               |                           |
| Arg103                                           | Arg79, Glu83                                                                                              | VDW                                                                                                   | Arg79, Glu83                                                                                              | Arg79                                                                                                 | Same as C20:2                                                          | Same as C20:2                               | Arg79                                                           |                           |

|              |                                           |                                                                                                                                 |             |                                           |               |               |               |                                            |
|--------------|-------------------------------------------|---------------------------------------------------------------------------------------------------------------------------------|-------------|-------------------------------------------|---------------|---------------|---------------|--------------------------------------------|
| CDR2 $\beta$ | Tyr48 <sup>O<math>\eta</math></sup>       | Glu83 <sup>O<math>\epsilon_1</math></sup> , Glu83 <sup>O<math>\epsilon_2</math></sup> ,<br>Lys86 <sup>N<math>\zeta</math></sup> | H bond      | Glu83 <sup>O<math>\epsilon_1</math></sup> | Same as C20:2 | Same as C20:2 | Same as C20:2 | Same as C20:2                              |
|              | Tyr48                                     | Glu83, Lys86                                                                                                                    | VDW         | Glu83, Lys86                              | Glu83         | Same as C20:2 | Same as C20:2 | Same as C20:2                              |
|              | Tyr50 <sup>O<math>\eta</math></sup>       | Glu83 <sup>O<math>\epsilon_1</math></sup>                                                                                       | H bond      | Glu83 <sup>O<math>\epsilon_1</math></sup> | Same as C20:2 | Same as C20:2 | Same as C20:2 | Same as C20:2                              |
|              | Tyr50                                     | Glu83, Met87                                                                                                                    | VDW         | Glu83, Met87                              | Same as C20:2 | Same as C20:2 | Same as C20:2 | Same as C20:2                              |
|              | Glu56 <sup>O<math>\epsilon_1</math></sup> | Lys86 <sup>N<math>\zeta</math></sup>                                                                                            | Salt bridge | -                                         | *Not seen     | -             | -             | <b>Lys86<sup>N<math>\zeta</math></sup></b> |
|              | Glu56                                     | Lys86                                                                                                                           | VDW         | Lys86                                     | *Not seen     | Same as C20:2 | Same as C20:2 | Same as C20:2                              |

| CDR           | NKT V $\beta$ 8.2                       | $\alpha$ -GalCer                                                                                 | Bond   | C20:2                                                      | $\alpha$ -GlcCer                                                                     | 4',4''-deoxy- $\alpha$ -GalCer                                                      | 4'-deoxy- $\alpha$ -GalCer                                                                                          | OCH                                                                                              |
|---------------|-----------------------------------------|--------------------------------------------------------------------------------------------------|--------|------------------------------------------------------------|--------------------------------------------------------------------------------------|-------------------------------------------------------------------------------------|---------------------------------------------------------------------------------------------------------------------|--------------------------------------------------------------------------------------------------|
| CDR1 $\alpha$ | Pro28                                   | 6'-OH <sup>G</sup> , 5'-O <sup>G</sup> , C-1 <sup>G</sup>                                        | VDW    | 6'-OH <sup>G</sup> , 5'-O <sup>G</sup> , C-1 <sup>G</sup>  | 5'-O <sup>G</sup> , C-1 <sup>G</sup> , <b>1'-O<sup>G</sup></b> ,<br>C-1 <sup>S</sup> | 6'-OH <sup>G</sup> , 5'-O <sup>G</sup>                                              | 6'-OH <sup>G</sup> , 5'-O <sup>G</sup>                                                                              | <b>C-6<sup>G</sup></b> , 5'-O <sup>G</sup> , 6'-OH <sup>G</sup> , C-1 <sup>G</sup>               |
|               | Asn30 <sup>N<math>\delta_2</math></sup> | 3'-OH <sup>G</sup> , 4'-OH <sup>G</sup>                                                          | H bond | 3'-OH <sup>G</sup> , 4'-OH <sup>G</sup>                    | 3'-OH <sup>G</sup>                                                                   | 4'-OH <sup>G</sup>                                                                  | 3'-OH <sup>G</sup>                                                                                                  | 3'-OH <sup>G</sup> , 4'-OH <sup>G</sup>                                                          |
|               | Asn30                                   | C-2 <sup>G</sup> , C-3 <sup>G</sup> , C-4 <sup>G</sup> , 3'-OH <sup>G</sup> , 4'-OH <sup>G</sup> | VDW    | C-3 <sup>G</sup> , 3'-OH <sup>G</sup> , 4'-OH <sup>G</sup> | C-2 <sup>G</sup> , C-3 <sup>G</sup>                                                  | C-2 <sup>G</sup> , C-3 <sup>G</sup> , C4 <sup>G</sup> , 4'-OH <sup>G</sup>          | -                                                                                                                   | C-2 <sup>G</sup> , C-3 <sup>G</sup> , C-4 <sup>G</sup> , 3'-OH <sup>G</sup> , 4'-OH <sup>G</sup> |
| CDR3 $\alpha$ | Asp94 <sup>O</sup>                      | C-1 <sup>G</sup>                                                                                 | VDW    | C-1 <sup>G</sup> , <b>C-2<sup>G</sup></b>                  | -                                                                                    | -                                                                                   | -                                                                                                                   | C-1 <sup>G</sup>                                                                                 |
|               | Arg95 <sup>N<math>\epsilon</math></sup> | -                                                                                                | -      | -                                                          | -                                                                                    | -                                                                                   | -                                                                                                                   | <b>3'-OH<sup>S</sup></b> (H bond)                                                                |
|               | Arg95                                   | 2'-OH <sup>G</sup> , C-2 <sup>G</sup> , 3'-OH <sup>S</sup>                                       | VDW    | 2'-OH <sup>G</sup> , C-2 <sup>G</sup> , 3'-OH <sup>S</sup> | 2'-OH <sup>G</sup> , <b>1'-O<sup>G</sup></b> , 3'-OH <sup>S</sup>                    | 2'-OH <sup>G</sup> , <b>C-1<sup>G</sup></b> , C-2 <sup>G</sup> , 3'-OH <sup>S</sup> | 2'-OH <sup>G</sup> , <b>C-1<sup>G</sup></b> , <b>1'-O<sup>G</sup></b> , <b>C-1<sup>S</sup></b> , 3'-OH <sup>S</sup> | 2'-OH <sup>G</sup> , C-2 <sup>G</sup> , 3'-OH <sup>S</sup>                                       |
|               | Gly96 <sup>N</sup>                      | 2'-OH <sup>G</sup>                                                                               | H bond | 2'-OH <sup>G</sup>                                         | -                                                                                    | 2'-OH <sup>G</sup>                                                                  | -                                                                                                                   | 2'-OH <sup>G</sup>                                                                               |
|               | Gly96                                   | C-2 <sup>G</sup> , 3'-OH <sup>G</sup>                                                            | VDW    | C-2 <sup>G</sup> , 3'-OH <sup>G</sup>                      | <b>2'-OH<sup>G</sup></b>                                                             | C-2 <sup>G</sup>                                                                    | <b>2'-OH<sup>G</sup></b>                                                                                            | C-2 <sup>G</sup>                                                                                 |

Atomic contacts determined with the CCP4i implementation of *CONTACT* and a cut-off of 4.5 Å.

Van der Waals interactions defined as non-hydrogen bond contact distances of 4.0 Å or less.

Hydrogen bond interactions are defined as contact distances of 3.3 Å or less.

Salt bridge is defined as contact distances of 4.5 Å or less.

<sup>G</sup> = contacts with Galactose head group.

<sup>S</sup> = contacts with Sphingosine chain.

\*Not seen = Electron density missing in structure.

**Bold** = Not observed in NKT TCR-CD1d- $\alpha$ -GalCer complex

**Bold** = Not observed in NKT TCR-CD1d-C20:2 complex



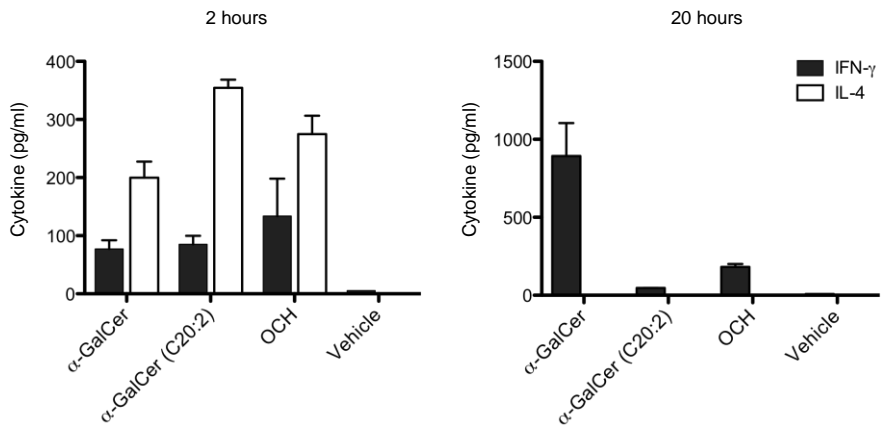

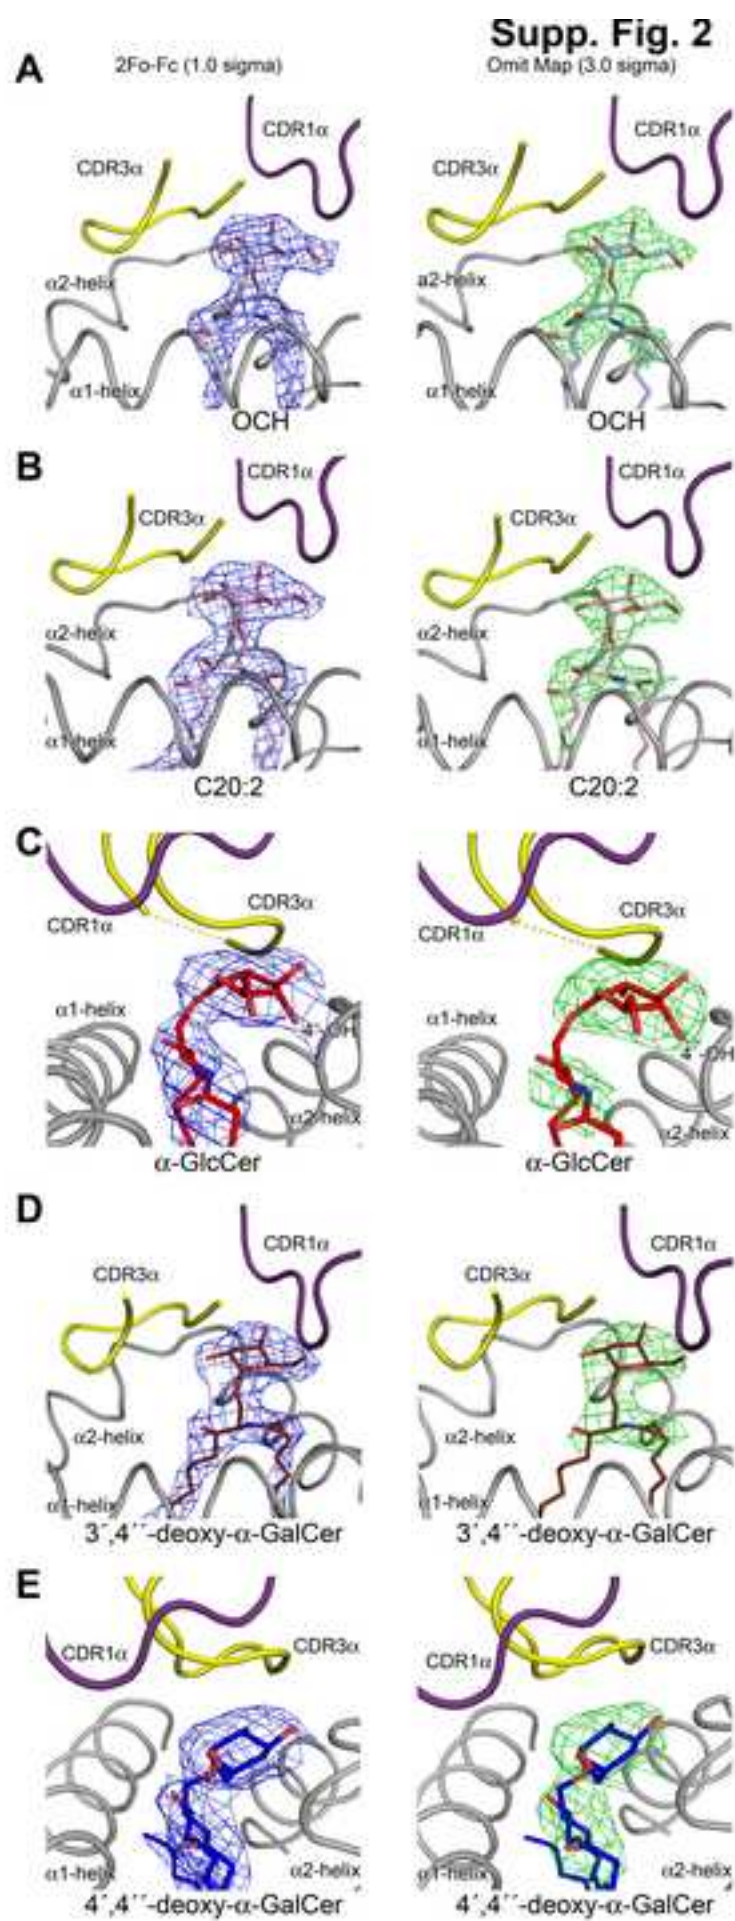

Supplement: NIHMS271431-supplement-01.pdf [file NIHMS271431-supplement-01.pdf]
